# Supplementary material for: Modeling SARS-CoV-2 Infection in Mice Using Lentiviral hACE2 Vectors Infers Two Modes of Immune Responses to SARS-CoV-2 Infection
Source: MDPI journal article supplement (doi:10.3390/v14010011), 2021-12-21
Supplement: s1 [file s1]

## Supplementary Material

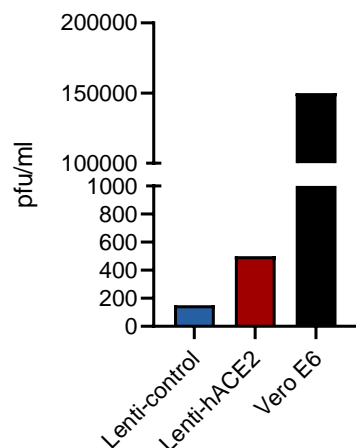

**Figure S1.** Productive SARS-CoV-2 infection of Lenti-hACE2 transduced LET1 cells. SARS-CoV-2 virus titers in culture media of Lenti-hACE2 and Lenti-control transduced LET1 cells or Vero E6 cells determined by plaque assay 24 hours post-infection. n=1. pfu – plaque-forming units.

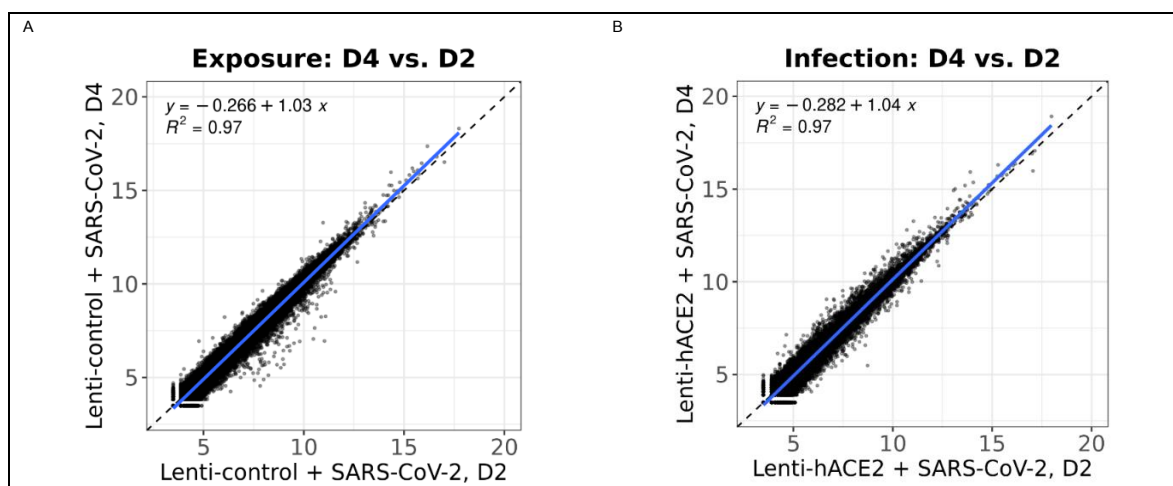

**Figure S2.** Comparison between D2 and D4 mice RNA-Seq for both the exposure model (A) and the infection model (B). Normalized counts were transformed with the vst function of the DESeq2 package and displayed as a scatter plot, comparing the different time points taken for each condition. The results of applying the 'lm' function on the data are shown as a blue line, with its equation and R squared indicated on the top left corner. The formula and R-square were added to the scatter plot image with the function 'stat\_poly\_eq' of the R package 'ggpmisc'

**Table S1.** Pathways upregulated in response to SARS-CoV-2 infection

| #  | Reactome                                        | NFS  |
|----|-------------------------------------------------|------|
| 1  | Metabolism of RNA                               | 10.8 |
| 2  | Innate immune system                            | 9.82 |
| 3  | Cell cycle mitotic                              | 8.97 |
| 4  | Cell cycle                                      | 8.78 |
| 5  | Infectious disease                              | 8.61 |
| 6  | Translation                                     | 8.37 |
| 7  | Neutrophil degranulation                        | 8.12 |
| 8  | Cellular responses to external stimuli          | 7.99 |
| 9  | HIV infection                                   | 7.81 |
| 10 | Processing of capped intron containing pre-mRNA | 7.5  |
